# Supplementary material for: A pyrene-based two-photon excitable fluorescent probe to visualize nuclei in live cells
Source: Royal Society of Chemistry journal article supplement (doi:10.1039/d0pp00107d), 2020-06-19
Supplement: d0pp00107d1.pdf [file d0pp00107d1.pdf]

# A pyrene-based two-photon excitable fluorescent probe to visualize nucleus in live cells

Chathura S. Abeywickrama<sup>a</sup>, Kaveesha J Wijesinghe<sup>c</sup>, Caroline B. Plescia<sup>d</sup>, Lloyd S. Fisher<sup>e</sup>, Theodore Goodson III,<sup>e</sup> Robert V. Stahelin<sup>d</sup> and Yi Pang<sup>a,b,\*</sup>

<sup>a</sup> Department of Chemistry & <sup>b</sup> Maurice Morton Institute of Polymer Science, University of Akron, Akron, Ohio 44325, USA.

<sup>c</sup> Department of Chemistry and Biochemistry, University of Notre Dame, Notre Dame, Indiana, USA.

<sup>d</sup> Department of Medicinal Chemistry and Molecular Pharmacology, Purdue University, West Lafayette, Indiana, 47907, USA.

<sup>e</sup> Department of Chemistry, University of Michigan, Ann Arbor, MI 48109.

## Supporting Information

---

\*Corresponding Author

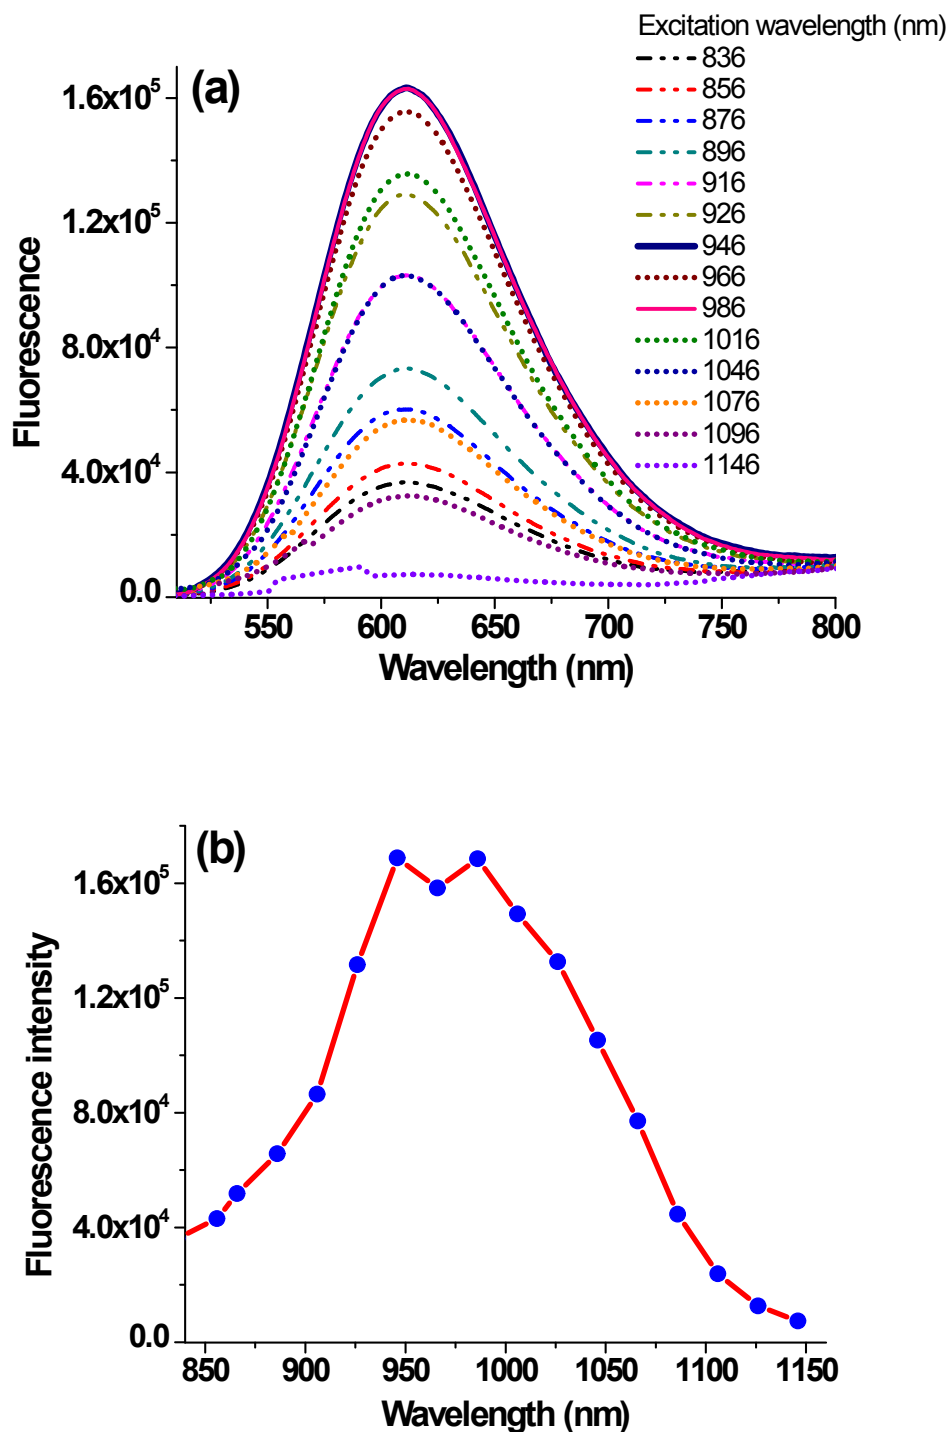

**Figure S1.** (a) The fluorescence spectra recorded at 610 nm for probe 1 ( $1 \times 10^{-5}$  M, in DCM) by exciting at 850 nm – 1150 nm wavelength range at room temperature. Figure (b) represents the plot of recorded fluorescence intensity at 610 nm as a function of excitation wavelength for Probe 1.

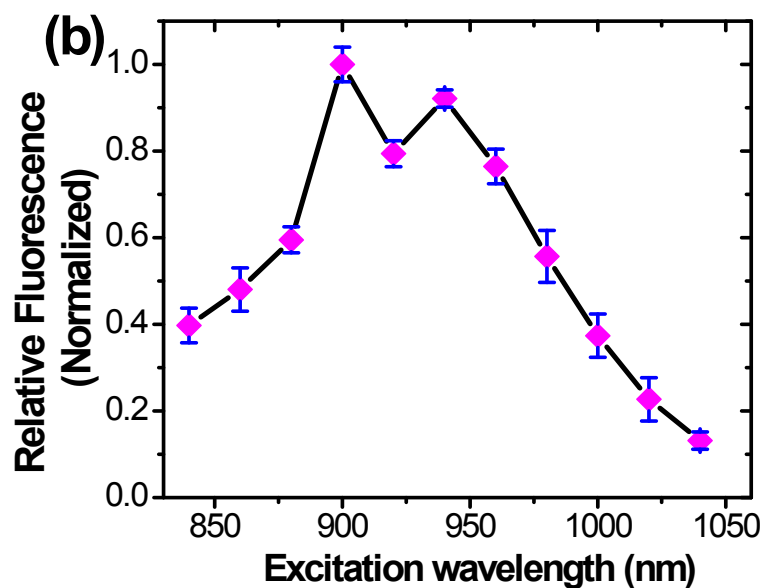

**Figure S2.1** The normalized fluorescence emission recorded at 610 nm by exciting the probe **1** ( $1 \times 10^{-5}$  M, in ethanol) in the wavelength range 850 – 1050 nm.

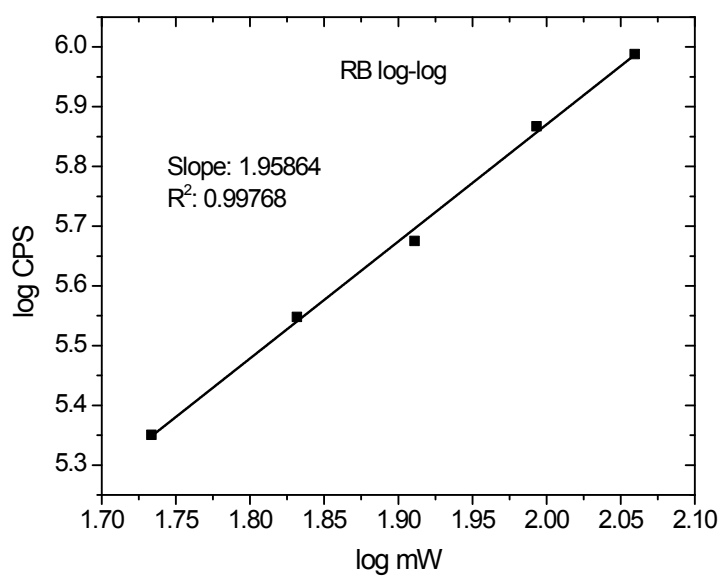

**Figure S2.2** Logarithmic plots of the power dependence of relative two-photon induced luminescence intensity of Rhodamine B.

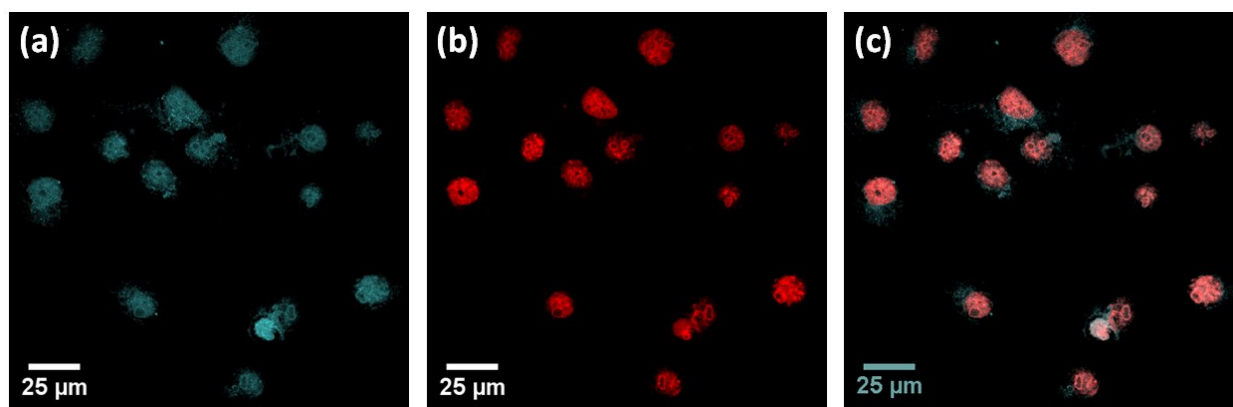

**Figure S3.** Fluorescent confocal microscopy images of COS-7 cells expressed with pmTurquoise-H2A (14 hours) and treated with probe **1** (500 nM) for 30 minutes. Images show the fluorescence of pmTurquoise-H2A expression (a), **1** staining (b) and their co-localization (c). pm Turquoise-H2A was excited with 454 nm laser line and emissions were collected from 465 nm to 525 nm. Probe **1** was excited with 488 nm laser line and emission were collected from 570 nm to 700 nm.

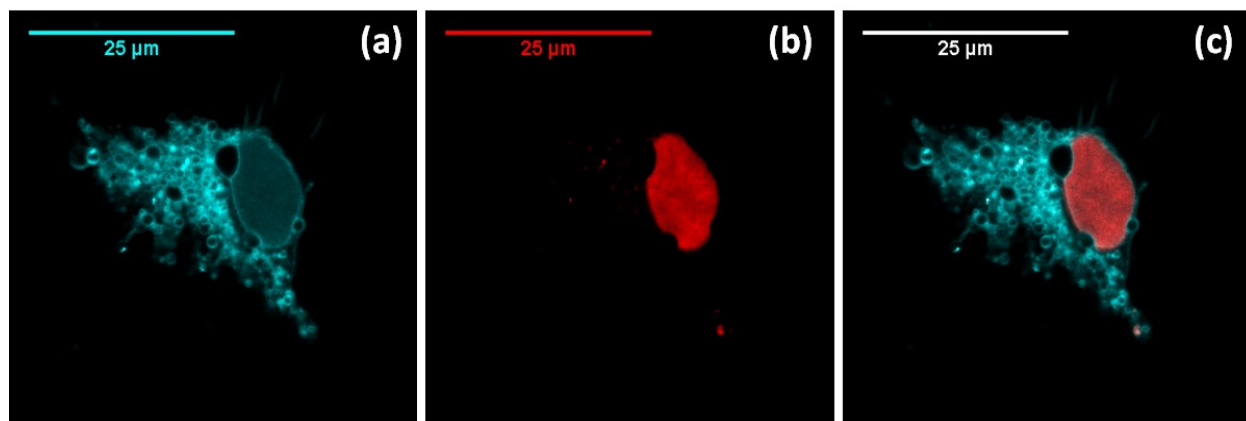

**Figure S4.** Fluorescent confocal microscopy images of COS-7 cells expressed with pmTurquoise-H2A (nucleus), pPalmitoyl-m-Turquoise2 (membranes) for 14 hours and treated with probe **1** (500 nM) for 30 minutes. Images show the fluorescence of pmTurquoise-H2A expression / pPalmitoyl-m-Turquoise2 expression (a), probe **1** staining (b) and their co-localization (c). pm Turquoise-H2A and pPalmitoyl-m-Turquoise2 were excited with 454 nm laser line and emissions were collected from 465 nm to 525 nm. Probe **1** was excited with 488 nm laser line and emission were collected from 570 nm to 700 nm.

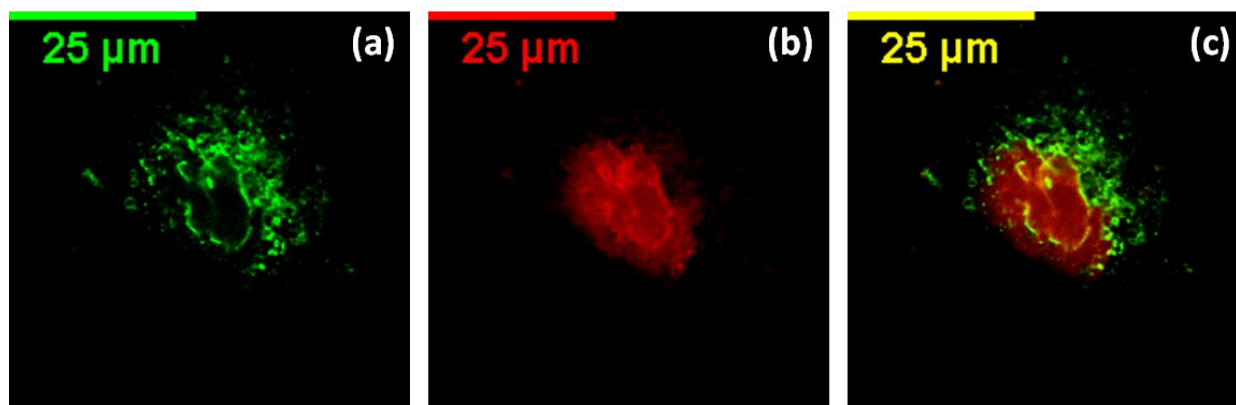

**Figure S5.** Fluorescent confocal microscopy images of COS-7 cells stained with MitoTracker® Green DND-26 (100 nM) and probe **1** (500 nM) for 30 minutes. Images show the fluorescence of MitoTracker® Green (a), probe **1** staining (b) and their overlapped image (c). pm MitoTracker® green was excited with 488 nm laser line and emissions were collected from 495 nm to 530 nm. Probe **1** was excited with 488 nm laser line and emission were collected from 595 nm to 700 nm.

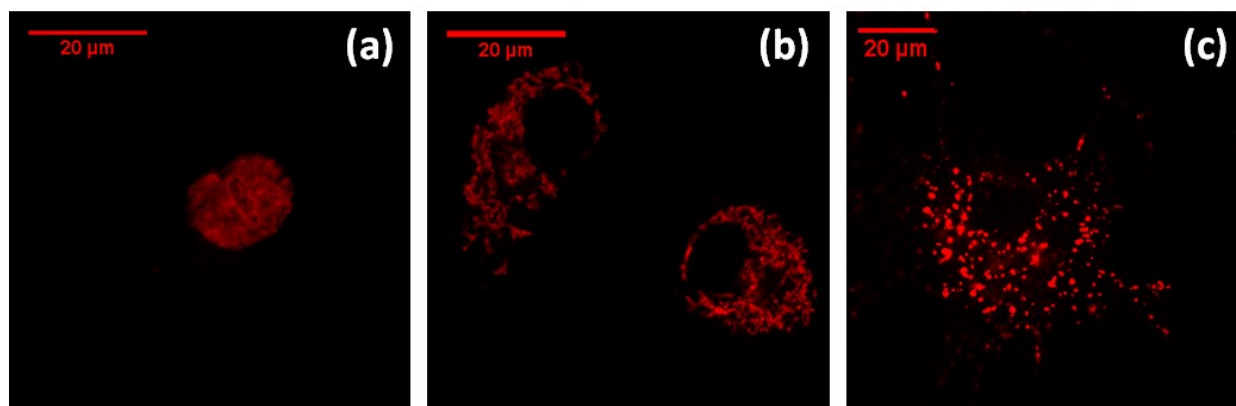

**Figure S6.** Fluorescent confocal microscopy images of COS-7 cells stained with Probe **1** (a), **2** (b), and **3** (c) with 500 nM concentration for 30 minutes. Images Probes **1** and **2** were excited with 488 nm laser line and emissions were collected from 570 nm to 700 nm. Probe **3** was excited with 561 nm laser line and emission were collected from 595 nm to 700 nm.

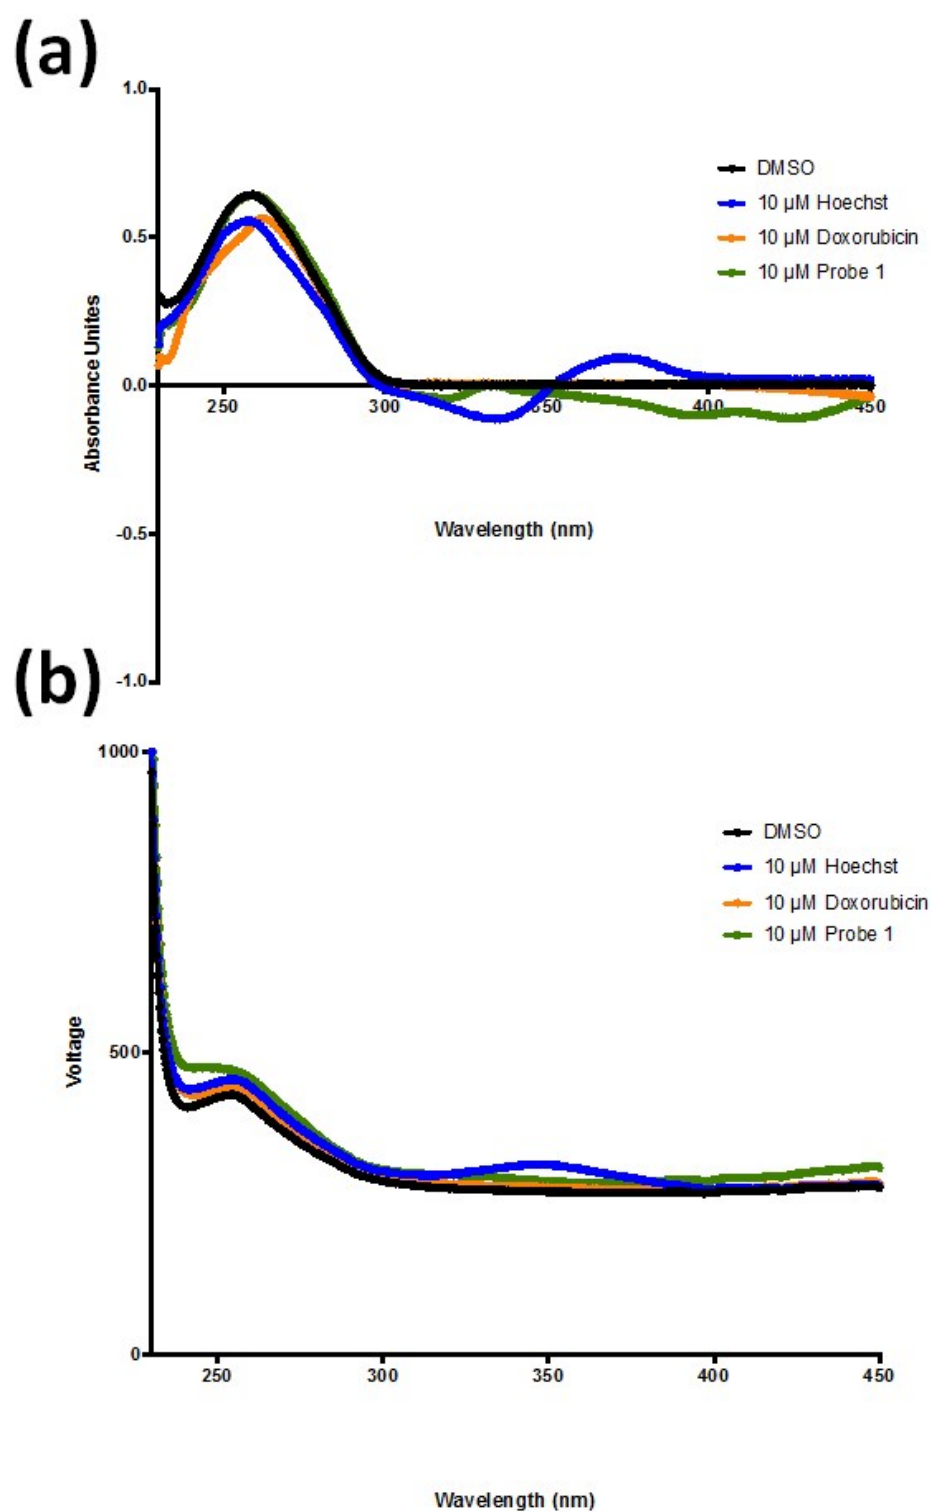

**Figure S7** Fluorescent Absorbance (a) and voltage (b) spectra obtained obtained for Hoechst, Doxorubicin, and **1** dissolved in DMSO (10  $\mu$ M) upon addition of calf thymus DNA at room temperature.

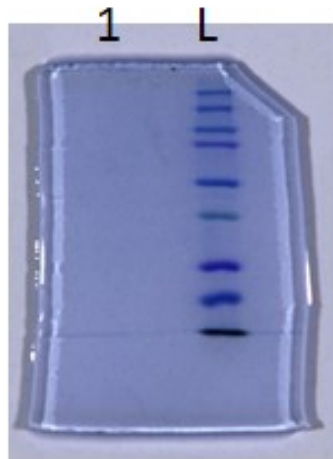

L = Kaleidoscope protein ladder

1= DNA sample used for CD.

Coomassie staining shows no protein contaminants

**Figure S8** Agarose gel electrophoresis result of the calf thymus DNA sample used for CD spectral analysis to confirm no protein contaminations in the sample.
